# Supplementary material for: The transcription factor EPAS1 links DOCK8 deficiency to atopic skin inflammation via IL-31 induction
Source: PubMed Central journal article supplement (PMC5228069; doi:10.1038/ncomms13946), 2017-01-09
Supplement: ncomms13946-s1.pdf [file ncomms13946-s1.pdf]

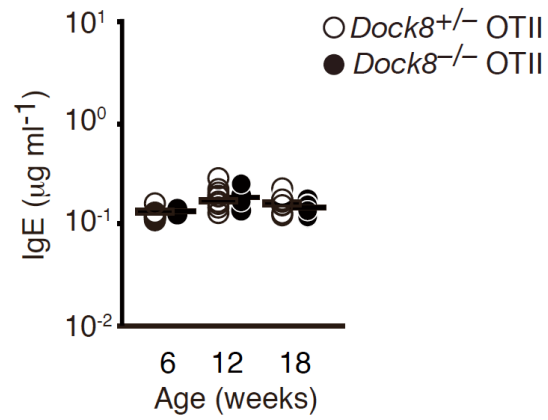

**Supplementary Figure 1 | Comparison of serum IgE levels between *Dock8*<sup>+/-</sup> and *Dock8*<sup>-/-</sup> OTII Tg mice.** Serum concentrations of IgE in *Dock8*<sup>+/-</sup> and *Dock8*<sup>-/-</sup> OTII Tg mice were compared at 6 ( $n = 10$ ), 12 ( $n = 9$ ) and 18 ( $n = 9$ ) weeks old. The lines indicate the mean values.

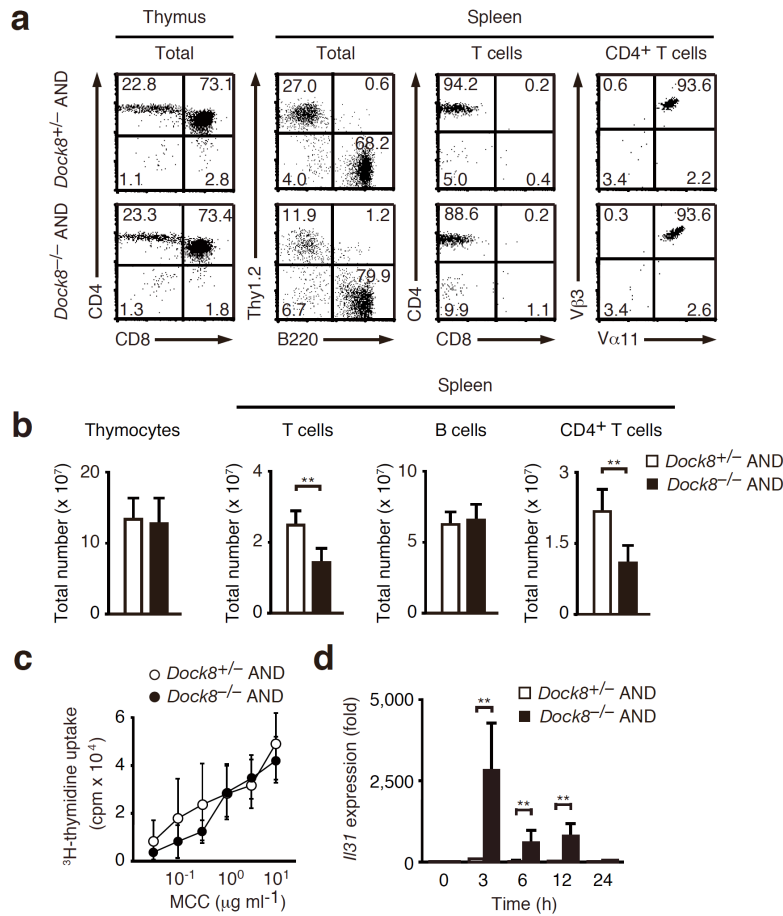

**Supplementary Figure 2 | DOCK8 acts as a negative regulator for IL-31 induction in *Dock8*<sup>-/-</sup> AND Tg mice.** (a,b) Flow cytometric analyses of thymocytes and spleen cells from 6–8-week-old *Dock8*<sup>+/-</sup> and *Dock8*<sup>-/-</sup> AND Tg mice. The numerals in quadrants indicate the percentage of each subset of leukocytes. Data are expressed as mean ± s.d. of 5 mice per group. \*\**P* < 0.01 (two-tailed Student's *t*-test). See Supplementary Fig. 10 for FACS gating strategy. (c) Antigen-specific proliferation of CD4<sup>+</sup> T cells from *Dock8*<sup>+/-</sup> and *Dock8*<sup>-/-</sup> AND Tg mice. Data are expressed as mean ± s.d. of 9 samples per group. (d) *Il31* gene expression in CD4<sup>+</sup> T cells from *Dock8*<sup>+/-</sup> and *Dock8*<sup>-/-</sup> AND Tg mice after secondary stimulation with anti-CD3ε and anti-CD28 antibodies. Expression (fold increase) is relative to that of *Dock8*<sup>+/-</sup> samples without secondary stimulation. Data are expressed as mean ± s.d. of 7 samples per group. Comparison was made between two groups at the same time point. \*\**P* < 0.01 (two-tailed Student's *t*-test).

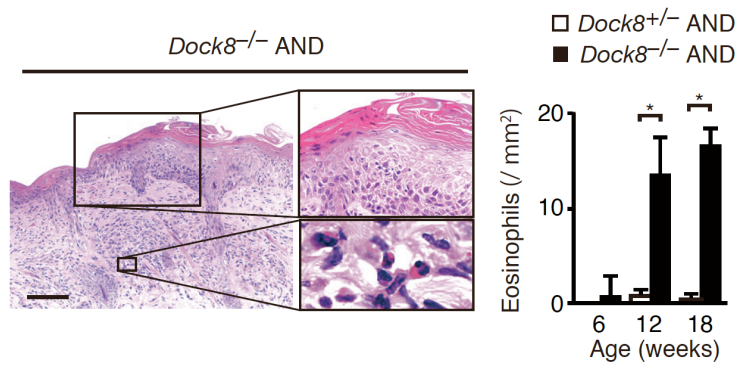

**Supplementary Figure 3 | Haematoxylin and eosin staining of the skin from 18-week-old *Dock8*<sup>-/-</sup> AND Tg mice.** Scale bar, 100  $\mu$ m. Magnified views of the boxed area show spongiosis (top) and the presence of eosinophils (bottom). The number of eosinophils per mm<sup>2</sup> was compared between *Dock8*<sup>+/-</sup> and *Dock8*<sup>-/-</sup> AND Tg mice. Data are expressed as mean  $\pm$  s.d. of 4 mice group. \* $P < 0.05$  (two-tailed Mann-Whitney test).

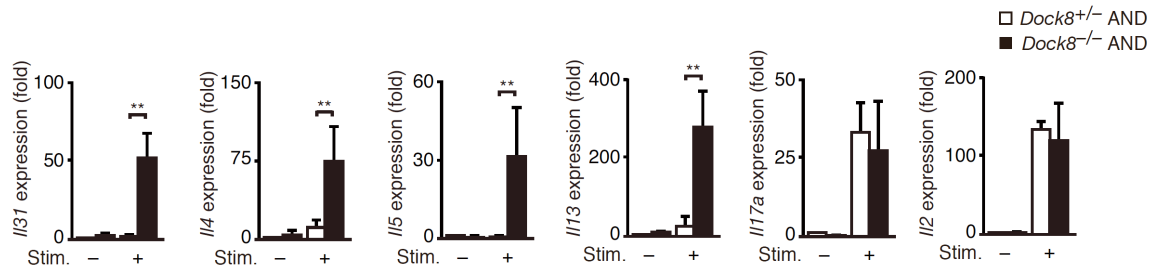

**Supplementary Figure 4 | The skin-infiltrating CD4<sup>+</sup> T cells in *Dock8*<sup>-/-</sup> AND Tg mice express Th2 cytokines.** The expression of cytokine genes in dermal CD4<sup>+</sup> T cells upon TCR stimulation. Expression (fold increase) is relative to that of the unstimulated samples. Data are expressed as mean ± s.d. of 6 samples per group. \*\**P* < 0.01 (two-tailed Student's *t*-test).

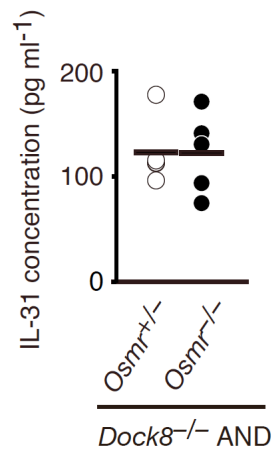

**Supplementary Figure 5 | Comparison of serum IL-31 levels between *OSMR*<sup>+/-</sup> and *OSMR*<sup>-/-</sup> *Dock8*<sup>-/-</sup> AND Tg mice.** Serum concentrations of IL-31 in *OSMR*<sup>+/-</sup> and *OSMR*<sup>-/-</sup> *Dock8*<sup>-/-</sup> AND Tg mice were compared at 18 weeks old ( $n = 5$ ). The lines indicate the mean values.

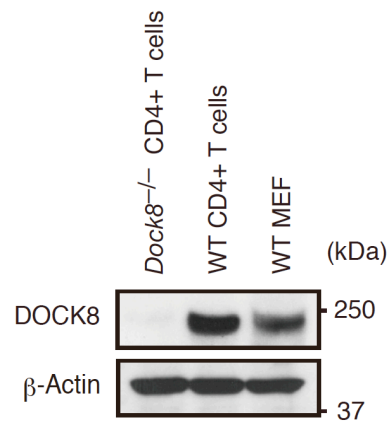

**Supplementary Figure 6 | Expression of DOCK8 in MEFs.** Cell extracts were prepared from CD4<sup>+</sup> T cells (WT and *Dock8*<sup>-/-</sup> mice) and WT MEFs, and were subjected to Western blot analysis using anti-DOCK8 and anti- $\beta$ actin antibodies.

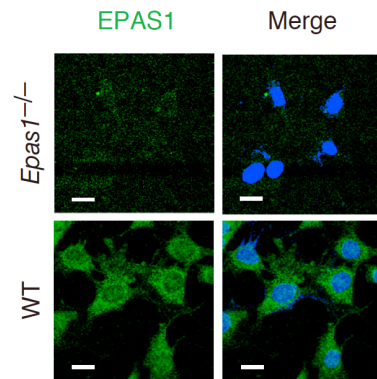

**Supplementary Figure 7 | Validation of anti-EPAS1 antibody used in immunofluorescence analyses.** Staining profiles of WT and *Epas1*<sup>-/-</sup> MEFs are shown. DAPI was used to stain nuclei. Scale bars, 20  $\mu$ m.

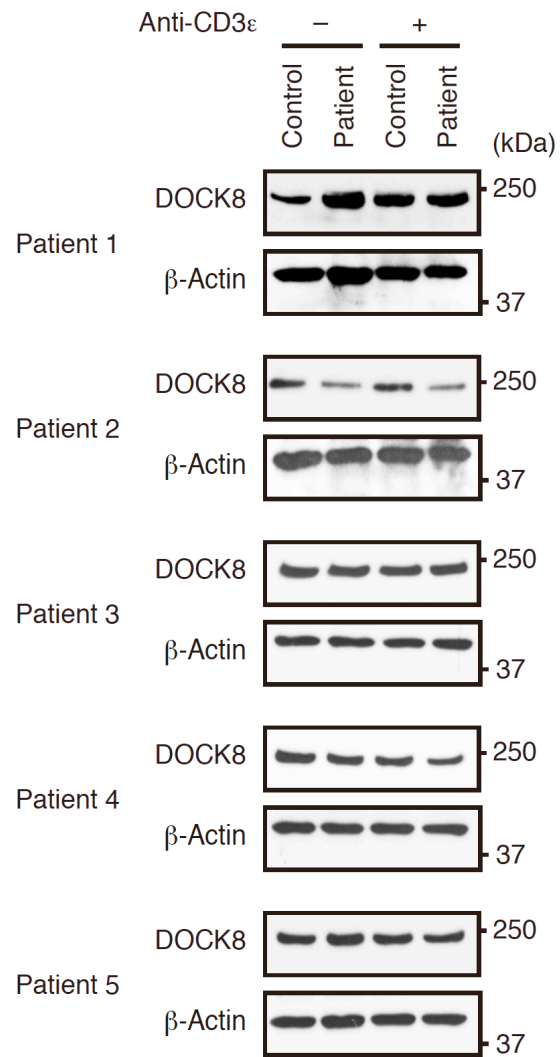

**Supplementary Figure 8 | Comparable expression of DOCK8 in CD4<sup>+</sup> T cells from AD patients and healthy controls.** Following cultivation of CD4<sup>+</sup> T cells in a 24-well plate coated with or without anti-CD3 $\epsilon$  antibody for 6 h, DOCK8 expression in CD4<sup>+</sup> T cells was analysed by immunoblotting.



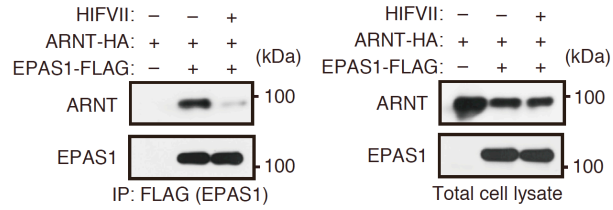

**Supplementary Figure 9 | Effect of HIFVII on association between EPAS1 and ARNT.** Following expression of FLAG-tagged EPAS1 and HA-tagged ARNT in HEK-293T cells, association between EPAS1 and ARNT was analysed in the presence or absence of HIFVII (30  $\mu$ M). Data are representative of three independent experiments.

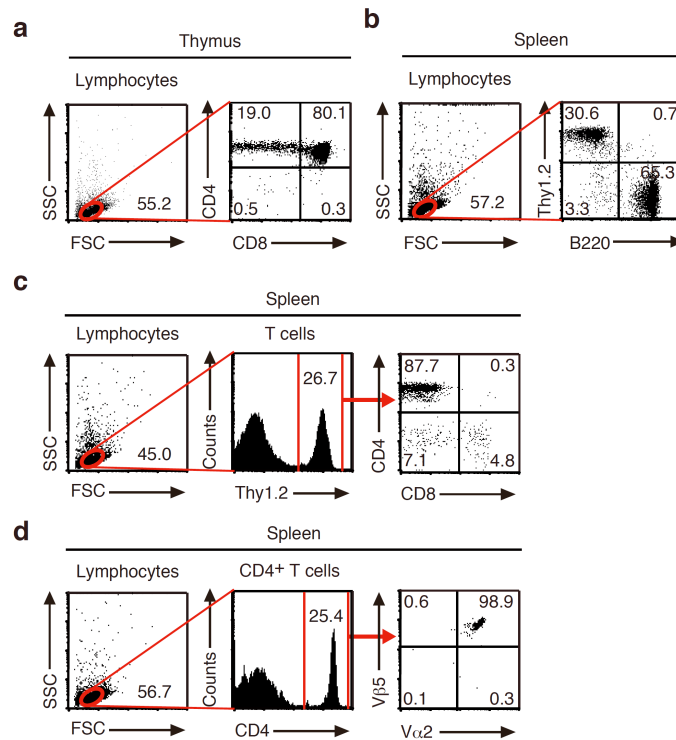

**Supplementary Figure 10 | FACS gating strategy used in Figure 1a.** (a,b) The gating strategy used to analyse the cell-surface expression of CD4, CD8, Thy1.2 (CD90.2) and/or B220 (CD45R) on total thymocytes and spleen cells. (c) The gating strategy used to analyse the cell-surface expression of CD4 and CD8 on Thy1.2<sup>+</sup> splenic T cells. (d) The gating strategy used to analyse the cell-surface expression of V $\alpha$ 2 and V $\beta$ 5 on splenic CD4<sup>+</sup> T cells.

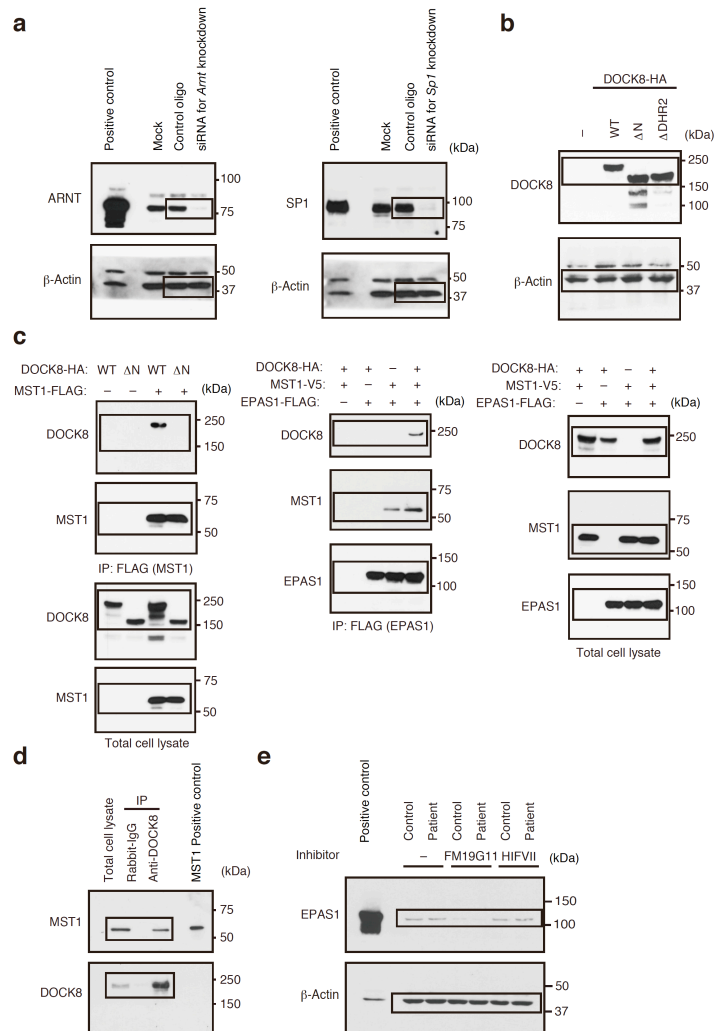

**Supplementary Figure 11 | Uncropped scans of the Western blots.** (a) Uncropped scans of the Western blots shown in Figure 5b. Positive control indicates HEK-293T cell extracts expressing pcDNA-ARNT-HA (left) or pcDNA-SP1-V5 (right). Mock, untreated MEF lysates. (b) Uncropped scans of the Western blots shown in Figure 6b. (c) Uncropped scans of the Western blots shown in Figure 6d. (d) Uncropped scans of the Western blots shown in Figure 6e. Positive control indicates HEK-293T cell extracts expressing pcDNA-MST1-V5. (e) Uncropped scans of the Western blots shown in Figure 7e. Positive control indicates HEK-293T cell extracts expressing pcDNA-EPAS1-FLAG.

**Supplementary Table 1 | Transcription factors differently expressed in activated CD4<sup>+</sup> T cells from *Dock8*<sup>+/-</sup> and *Dock8*<sup>-/-</sup> AND Tg mice.**

| List number | Gene name      | Z-score     | Z-ratio *   | <i>Dock8</i> <sup>+/-</sup> AND Tg Signal | <i>Dock8</i> <sup>-/-</sup> AND Tg Signal |
|-------------|----------------|-------------|-------------|-------------------------------------------|-------------------------------------------|
| 1           | <i>Batf2</i>   | 6.054390159 | 3.615418102 | 1421.913                                  | 5140.81                                   |
| 2           | <i>Mamstr</i>  | 5.114130366 | 24.37466596 | 4.394995                                  | 107.126535                                |
| 3           | <i>Tbx21</i>   | 4.750302424 | 2.741328011 | 2987.6795                                 | 8190.2095                                 |
| 4           | <i>Batf3</i>   | 4.309980069 | 2.496758712 | 2801.8955                                 | 6995.657                                  |
| 5           | <i>Ajuba</i>   | 4.246428907 | 2.960550293 | 274.272                                   | 811.99605                                 |
| 6           | <i>Sox12</i>   | 4.189911176 | 13.68761314 | 9.8169015                                 | 134.36995                                 |
| 7           | <i>Epas1</i>   | 4.178403297 | 2.428002711 | 824.1352                                  | 2001.0025                                 |
| 8           | <i>Gfi1</i>    | 3.772857413 | 1.979372381 | 5880.417                                  | 11639.535                                 |
| 9           | <i>Esr1</i>    | 3.743103396 | 10.35550974 | 7.468642                                  | 77.341595                                 |
| 10          | <i>Atf3</i>    | 3.632725431 | 2.162490159 | 3184.8975                                 | 6887.3095                                 |
| 11          | <i>Klf17</i>   | 3.535121188 | 9.094421931 | 7.8169075                                 | 71.090255                                 |
| 12          | <i>Maf</i>     | 3.521061799 | 2.459331282 | 519.41335                                 | 1277.4095                                 |
| 13          | <i>Jdp2</i>    | 3.080611771 | 2.197369027 | 779.1263                                  | 1712.028                                  |
| 14          | <i>Klf4</i>    | 3.065655669 | 1.917288313 | 924.21885                                 | 1771.994                                  |
| 15          | <i>Ifi204</i>  | 2.895831887 | 1.68860953  | 5904.19                                   | 9969.8715                                 |
| 16          | <i>Etv6</i>    | 2.671272723 | 1.763344721 | 2751.8465                                 | 4852.454                                  |
| 17          | <i>Stat2</i>   | 2.623324545 | 1.745491939 | 3371.5435                                 | 5885.002                                  |
| 18          | <i>Fos11</i>   | 2.581422651 | 2.448300343 | 80.351355                                 | 196.72425                                 |
| 19          | <i>Cited1</i>  | 2.578193795 | 5.003743099 | 32.33951                                  | 161.8186                                  |
| 20          | <i>Jun</i>     | 2.544284329 | 1.584425847 | 7257.5375                                 | 11499.03                                  |
| 21          | <i>Hif1a</i>   | 2.538211437 | 1.582683758 | 5029.313                                  | 7959.812                                  |
| 22          | <i>Nfil3</i>   | 2.506781342 | 1.573698186 | 6755.2375                                 | 10630.705                                 |
| 23          | <i>Hmox1</i>   | 2.411310819 | 1.546715677 | 10014.2775                                | 15489.24                                  |
| 24          | <i>Cebpe</i>   | 2.406260935 | 1.666906096 | 1086.6125                                 | 1811.281                                  |
| 25          | <i>Fosl2</i>   | 2.388469328 | 1.660623906 | 1069.103                                  | 1775.378                                  |
| 26          | <i>Rora</i>    | 2.372133869 | 1.833256421 | 487.3513                                  | 893.4399                                  |
| 27          | <i>Irf7</i>    | 2.362097484 | 1.828557525 | 637.63895                                 | 1165.9595                                 |
| 28          | <i>Pou4f1</i>  | 2.329520671 | 2.244227222 | 69.325155                                 | 155.5814                                  |
| 29          | <i>Etv5</i>    | 2.317445706 | 1.807797737 | 654.55525                                 | 1183.3035                                 |
| 30          | <i>Trp73</i>   | 2.296821033 | 4.197571138 | 9.113487                                  | 38.25451                                  |
| 31          | <i>Gata2</i>   | 2.286631205 | 2.211216496 | 84.760425                                 | 187.42365                                 |
| 32          | <i>Id2</i>     | 2.284644354 | 1.511629124 | 5315.74139                                | 8035.4295                                 |
| 33          | <i>L3mbtl4</i> | 2.230225584 | 21.87445325 | 3.497932                                  | 76.51535                                  |
| 34          | <i>Vdr</i>     | 2.200379051 | 1.754482493 | 405.45235                                 | 711.35905                                 |
| 35          | <i>Egr2</i>    | 2.152819179 | 1.579615749 | 2410.302                                  | 3807.351                                  |
| 36          | <i>Irf5</i>    | 2.141055969 | 1.575677169 | 3423.3145                                 | 5394.0385                                 |
| 37          | <i>Tnfrsf8</i> | 2.126463292 | 3.77401759  | 24.47883                                  | 92.383535                                 |
| 38          | <i>Ebfl</i>    | 2.109422355 | 2.079893488 | 90.175435                                 | 187.5553                                  |
| 39          | <i>Tead2</i>   | 2.109112214 | 3.733352586 | 15.997455                                 | 59.72414                                  |
| 40          | <i>Tcf4</i>    | 2.039810673 | 1.542181476 | 1192.9585                                 | 1839.7585                                 |

\*Z-ratio was calculated by dividing the values of *Dock8*<sup>-/-</sup> AND Tg samples by those of *Dock8*<sup>+/-</sup> AND Tg samples.

**Supplementary Table 2 | Demographic information for AD patients and healthy controls.**

| AD<br>n=6 | Age (year)<br>Mean ± median<br>35.2 ± 4.7 | Sex    | Severity |
|-----------|-------------------------------------------|--------|----------|
| Patient 1 | 33                                        | Male   | moderate |
| Patient 2 | 30                                        | Male   | moderate |
| Patient 3 | 43                                        | Male   | severe   |
| Patient 4 | 29                                        | Female | moderate |
| Patient 5 | 54                                        | Female | moderate |
| Patient 6 | 22                                        | Male   | moderate |

| Healthy<br>Controls<br>n=6 | Age (year)<br>Mean ± median<br>29.0 ± 1.3 | Sex    |
|----------------------------|-------------------------------------------|--------|
| Control 1                  | 24                                        | Male   |
| Control 2                  | 33                                        | Male   |
| Control 3                  | 28                                        | Male   |
| Control 4                  | 31                                        | Female |
| Control 5                  | 28                                        | Female |
| Control 6                  | 30                                        | Female |

**Supplementary Table 3 | The primers used for conventional RT-PCR and real-time PCR in this study.**

Conventional RT-PCR

|              |                                                                       |
|--------------|-----------------------------------------------------------------------|
| <i>Gapdh</i> | 5' -CAGTATGACTCCACTCACGGC-3'<br>5' -TCACGCCACAGCTTTCCAGAG-3'          |
| <i>Il31</i>  | 5' -AAACAAGAGTCTCAGGATCTTTATAACAAC-3'<br>5' -AGCCATCTTATCACCCAAGAA-3' |
| <i>Epas1</i> | 5' -GAGCAAAGGGTCCCTGTCTC-3'<br>5' -AATTCATCGGGGGCCATGTT-3'            |
| <i>Mst1</i>  | 5' -GGCAGCGTGTACAAGGCTAT-3'<br>5' -ATATGGGGGCTTTCCTTCAG-3'            |
| <i>GAPDH</i> | 5' -CCCATCACCATCTTCCAG-3'<br>5' -ATGACCTTGCCACAGCC-3'                 |
| <i>DOCK8</i> | 5' -CGACTTGGACGTGGTGTTCACG-3'<br>5' -TTCTGTTGCCAGGTGTTCTTG-3'         |
| <i>EPAS1</i> | 5' -GAGTCCTCAGCCTATGGCAAG-3'<br>5' -CGGCATCAAAGAAGATGGAG-3'           |

Real-time PCR

|              |                                                                       |
|--------------|-----------------------------------------------------------------------|
| <i>Hprt</i>  | 5' -CTGGTGAAAAGGACCTCTCG-3'<br>5' -TGAAGTACTCATTATAGTCAAGGGCA-3'      |
| <i>Il31</i>  | 5' -AAACAAGAGTCTCAGGATCTTTATAACAAC-3'<br>5' -ACGGCAGCTGTATTGATTCGT-3' |
| <i>Il4</i>   | 5' -CGAAGAACCACAGAGAGTGAGCT-3'<br>5' -GACTCATTCATGGTGCAGCTTATCG-3'    |
| <i>Il5</i>   | 5' -AAAGAGAAGTGTGGCGAGGAGA-3'<br>5' -CACCAAGGAACTCTTGCAGGTAA-3'       |
| <i>Il13</i>  | 5' -GAGCAACATCACACAAGACCAGA-3'<br>5' -GGCCAGGTCCACACTCCATA-3'         |
| <i>Il17a</i> | 5' -CTCCAGAAGGCCCTCAGACTAC-3'<br>5' -GGGTCTTCATTGCGGTGG-3'            |
| <i>Il2</i>   | 5' -CCTGAGCAGGATGGAGAATTACA-3'<br>5' -TCCAGAACATGCCGCAGAG-3'          |
| <i>GAPDH</i> | 5' -GTGAAGGTCGGAGTCAACG-3'<br>5' -GGTGAAGACGCCAGTGGACTC-3'            |
| <i>IL31</i>  | 5' -TGGACCTCGCACTAAAATCATTG-3'<br>5' -CGAAAGGAAGAGATGGCCTTAA-3'       |
| <i>IL2</i>   | 5' -GCAACTCCTGTCTTGCATTG-3'<br>5' -CAGTTCTGTGGCCTTCTTGG-3'            |
